# Supplementary material for: How do colonial Eurasian Griffon Vultures prevent extra-pair mating?
Source: PeerJ. 2016 Feb 29;4:e1749. doi: 10.7717/peerj.1749 (PMC4782733; doi:10.7717/peerj.1749)
Supplement: Data S1 [file peerj-04-1749-s001.xls]

## Sheet: Hoja1
	Frequency (copulation attempts per hour)	Duration (seconds)	% of Presence (one individual)	% of Presence (two individuals)	Intrusions per hour	Period
Collegats1	0.08	27	23.2	35.9	0.05	Early
Collegats2	0.02	30	38	34.5	0.05	Early
Collegats3	0	33	15.9	25	0.02	Early
Collegats4	0.05	30.3	51.3	19.3	0.02	Early
Collegats5	0.11		17.1	10.7	0.05	Early
Pessonada1	0.08	32	9.7	48.1	0.06	Early
Pessonada2	0.09	55.7	20.9	20.6	0.05	Early
Pessonada3	0.17	25	13.8	30.6	0.1	Early
Pessonada4	0	39	12.5	0	0.07	Early
Pessonada5	0.13		2.9	11.8	0.02	Early
Serradell1	0.09	22	50.2	8.4	0	Early
Serradell2	0.24	30.5	17.8	32.8	0	Early
Serradell3	0.23	19.3	17.7	43.8	0.13	Early
Serradell4	0.1	23	2.7	28.2	0	Early
Serradell5	0.03	27	14.5	23.8	0	Early
Serradell6	0	50.5	23.4	16.6	0.6	Early
Serradell7	0.18	42.5	53.1	46.9	0	Early
Serradell8	0.09		43.3	26.3	0.14	Early
Roc Santa1	0.22	74.7	30.3	40.5	0.05	Early
Roc Santa2	0.22	31	19.3	87.7	0.04	Early
Roc Santa3	0.25	25	39.9	38.1	0	Early
Roc Santa4	0.06	24	20.3	35.1	0.03	Early
Roc Santa5	0		11.6	47.4	0.03	Early
Comiols1	0.17	39.3	32.2	50	0.04	Early
Comiols2	0	35	52.1	24.7	0.04	Early
Comiols3	0.11	21.6	36.5	33.3	0	Early
Comiols4	0.19	20	19.6	34.7	0.03	Early
Comiols5	0.06		3.9	22.3	0.03	Early
Canals1	0.1		23.9	32.3	0.12	Early
Canals2	0.09		18.2	38.1	0.09	Early
Canals3	0.1		22.6	38.3	0.06	Early
Canals4	0.13		9.3	40.7	0.16	Early
Canals5	0.04		25.5	35.2	0.15	Early
Collegats1	0.48	24	18.1	57.6	0	Late
Collegats2	0.5	30.9	53.4	35.1	0.31	Late
Collegats3	0.45	67.4	10.8	24.9	0.09	Late
Collegats4	0.35	27	52.6	42	0	Late
Collegats5	0.36	26.3	12.6	47.9	0.13	Late
Pessonada1	0.43	25	32.5	41.4	0	Late
Pessonada2	0.17	32.4	45.5	47.8	0.35	Late
Pessonada3	0.61	26	8.9	65.7	0.26	Late
Pessonada4	0.09	59.3	32.3	12	0	Late
Pessonada5	0.35		12.7	55	0.18	Late
Serradell1	0.1	25	50.2	8.4	0	Late
Serradell2	0	33.5	17.8	32.8	0.2	Late
Serradell3	0.6	24	17.7	43.8	0	Late
Serradell4	0.4	39	2.7	28.2	0	Late
Serradell5	0.4	112	14.5	23.8	0.1	Late
Serradell6	0.7	77	23.4	16.6	0	Late
Serradell7	0.5	70	53.1	46.9	0	Late
Serradell8	0.1		43.3	26.3	0	Late
Roc Santa1	0.1	92	62	23.2	0.17	Late
Roc Santa2	0.6	29.5	3.7	73.3	0	Late
Roc Santa3	0.64	31	39.7	57	0.2	Late
Roc Santa4	0.2	74.3	9.7	90	0.37	Late
Roc Santa5	0		72	7.3	0	Late
Comiols1	0.2	35	26.3	71.7	0	Late
Comiols2	0.1	36	48.7	12.4	0	Late
Comiols3	0.21	36	8.6	70.2	0	Late
Comiols4	0.21	25	15.4	57.9	0.21	Late
Comiols5	0.62	44.9	10.3	43.6	0.1	Late
Canals1	0.41		24.4	33.3	0.08	Late
Canals2	0.42		28.2	57.5	0.37	Late
Canals3	0.11		34.5	42.9	0.06	Late
Canals4	0.3		57.7	38.8	0.1	Late
Canals5	0.2		32.1	60.5	0	Late
